# Supplementary material for: Chiral one-dimensional O–P–O bridged MnIII-Schiff base complexes
Source: Royal Society of Chemistry journal article supplement (doi:10.1039/c2dt32171h), 2012-10-25
Supplement: c2dt32171h.pdf [file c2dt32171h.pdf]

## Supporting Information

### Chiral One-dimensional O-P-O bridged Mn<sup>III</sup>-Schiff base complexes

Ting-Ting Wang, Song-Song Bao\*, Jian Huang, Yi-Zhi Li, Li-Min Zheng\*

State Key Laboratory of Coordination Chemistry, Coordination Chemistry Institute, School of Chemistry and Chemical Engineering,  
Nanjing University, Nanjing 210093, P. R. China; E-mail: lmzheng@nju.edu.cn, baososo@nju.edu.cn

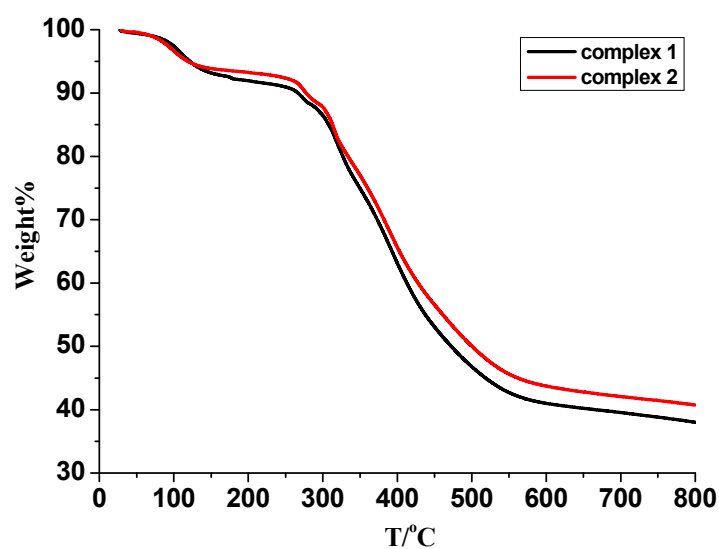

Figure S1. The TG curves of 1 and 2.

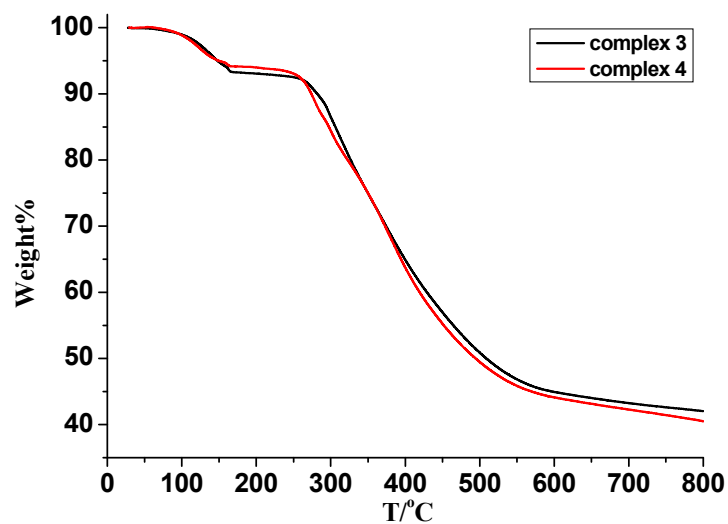

Figure S2. The TG curves of 3 and 4.

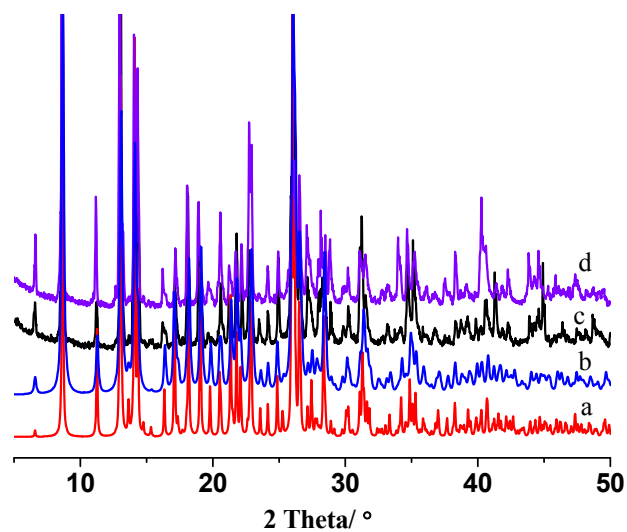

**Figure S3.** Powder X-ray diffraction patterns for **1-2**: (a) simulated from single-crystal data of **1**, (b) simulated from single-crystal data of **2**, (c) bulk sample of **1**, (d) bulk sample of **2**.

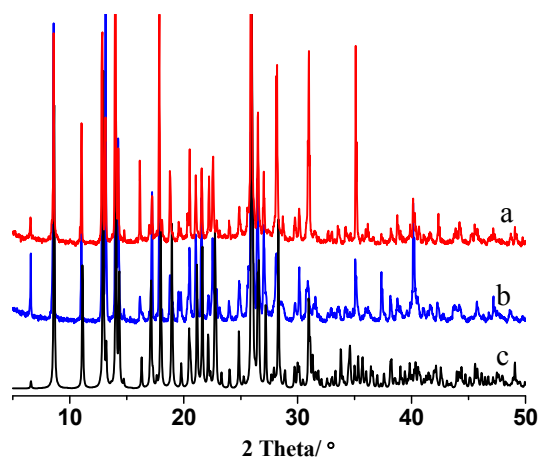

**Figure S4.** Powder X-ray diffraction patterns for **3-4**: (a) simulated from single-crystal data of **3**, (b) bulk sample of **4**, (c) bulk sample of **3**.

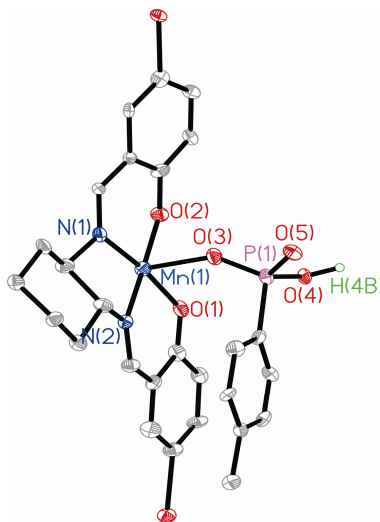

**Figure S5.** Structural unit of **3** showing the atomic labeling scheme (30% probability). All hydrogen atoms except those attached to the oxygen atoms are omitted for clarity.

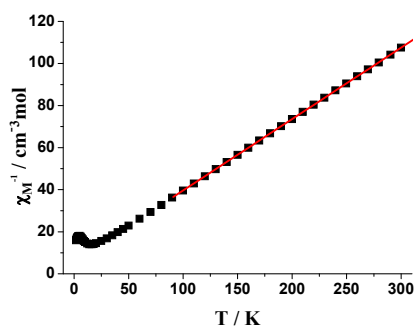

**Figure S6.** Plot of the  $1/\chi_M$  versus  $T$  for **1**. The red solid line represents the best fit of the data above 100 K.

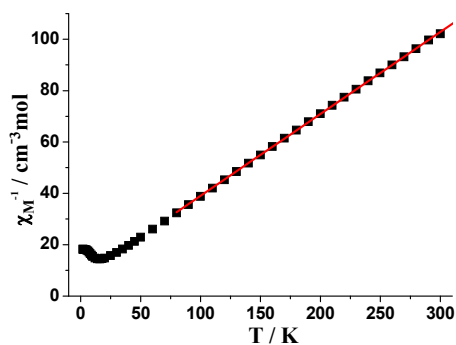

**Figure S7.** Plot of the  $1/\chi_M$  versus  $T$  for **3**. The red solid line representd the best fit of the data above 100 K.

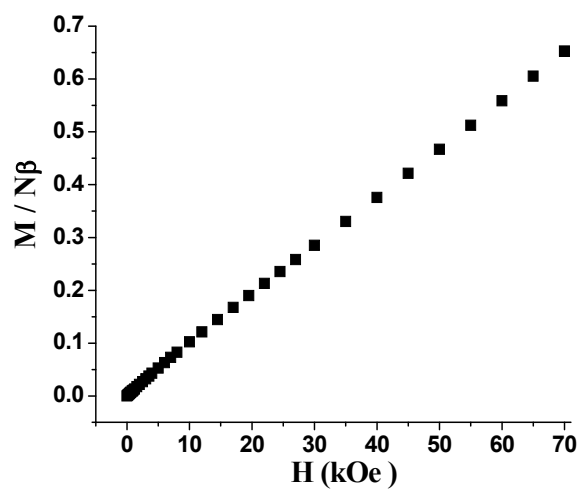

**Figure S8.** Field-dependent magnetization of **1** at 2 K.

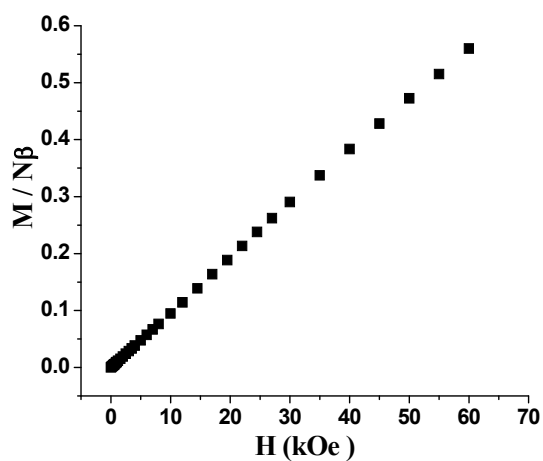

**Figure S9.** Field-dependent magnetization of **3** at 2 K.

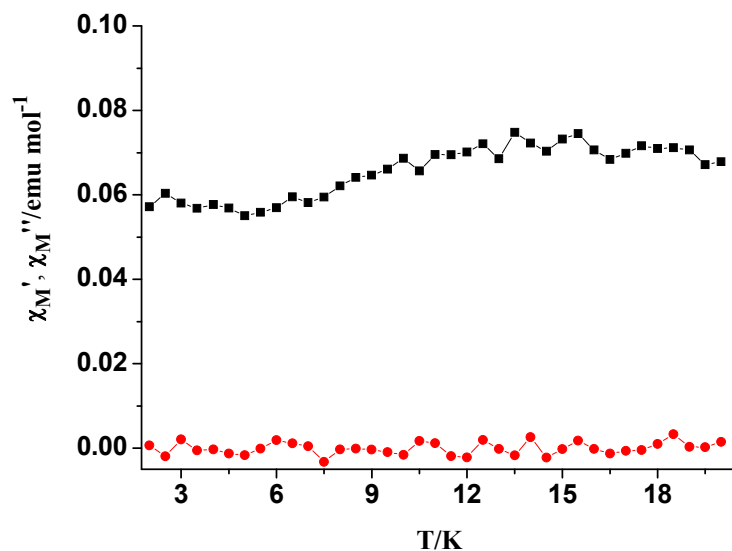

**Figure S10.** Plots of in-phase ( $\chi_M'$ , black) and out-of-phase ( $\chi_M''$ , red) ac magnetic susceptibility versus  $T$  at 1 Hz for **1**.

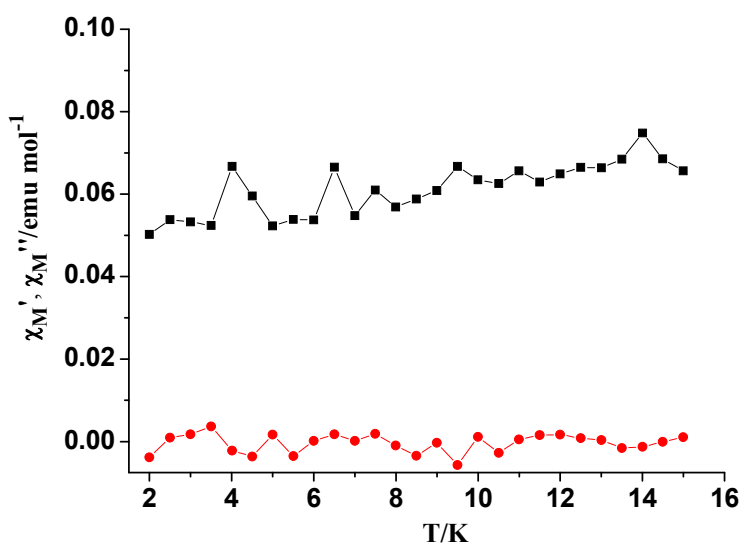

**Figure S11.** Plots of in-phase ( $\chi_M'$ , black) and out-of-phase ( $\chi_M''$ , red) ac magnetic susceptibility versus  $T$  at 1 Hz for **3**.
